# Supplementary material for: Caffeine intake exerts dual genome-wide effects on hippocampal metabolism and learning-dependent transcription
Source: PubMed Central journal article supplement (PMC9197525; doi:10.1172/jci149371), 2022-06-15
Supplement: jci-132-149371-s142.pdf [file jci-132-149371-s142.pdf]

Supplementary Materials for

## **Caffeine intake exerts dual genome-wide effects on hippocampal metabolism and learning-dependent transcription**

Isabel Paiva<sup>1†</sup>, Lucrezia Cellai<sup>2,3†</sup>, Céline Mériaux<sup>2,3†</sup>, Lauranne Poncelet<sup>4†</sup>, Ouada Nebie<sup>2,3</sup>, Jean-Michel Saliou, Anne-Sophie-Lacoste, Anthony Papegaey<sup>2,3</sup>, Hervé Drobecq<sup>6</sup>, Stéphanie Le Gras<sup>7</sup>, Marion Schneider<sup>8</sup>, Enas M. Malik<sup>8</sup>, Christa E. Müller<sup>8</sup>, Emilie Faivre<sup>1,2</sup>, Kevin Carvalho<sup>2,3</sup>, Victoria Gomez-Murcia<sup>2,3</sup>, Didier Vieau<sup>2,3</sup>, Bryan Thiroux<sup>2,3</sup>, Sabiha Eddarkaoui<sup>2,3</sup>, Thibaud Lebouvier<sup>2,3,8</sup>, Estelle Schueller<sup>1</sup>, Laura Tzeplaeff<sup>1</sup>, Iris Grgurina<sup>1</sup>, Jonathan Seguin<sup>1</sup>, Jonathan Stauber<sup>4</sup>, Luisa V. Lopes<sup>9</sup>, Luc Buée<sup>2,3</sup>, Valérie Buée-Scherrer<sup>2,3</sup>, Rodrigo A. Cunha<sup>10,11</sup>, Rima Ait-Belkacem<sup>4‡</sup>, Nicolas Sergeant<sup>2,3‡</sup>, Jean-Sébastien Annicotte<sup>12,13‡</sup>, Anne-Laurence Boutillier<sup>1‡\*</sup>, David Blum<sup>2,3‡\*</sup>

\*Corresponding author. Email: [david.blum@inserm.fr](mailto:david.blum@inserm.fr)

### **This PDF file includes:**

Figs. S1 to S6  
Tables S1 to S4: only legends with excel data downloaded  
Table S5  
Tables S6 to S9: only legends with excel data downloaded

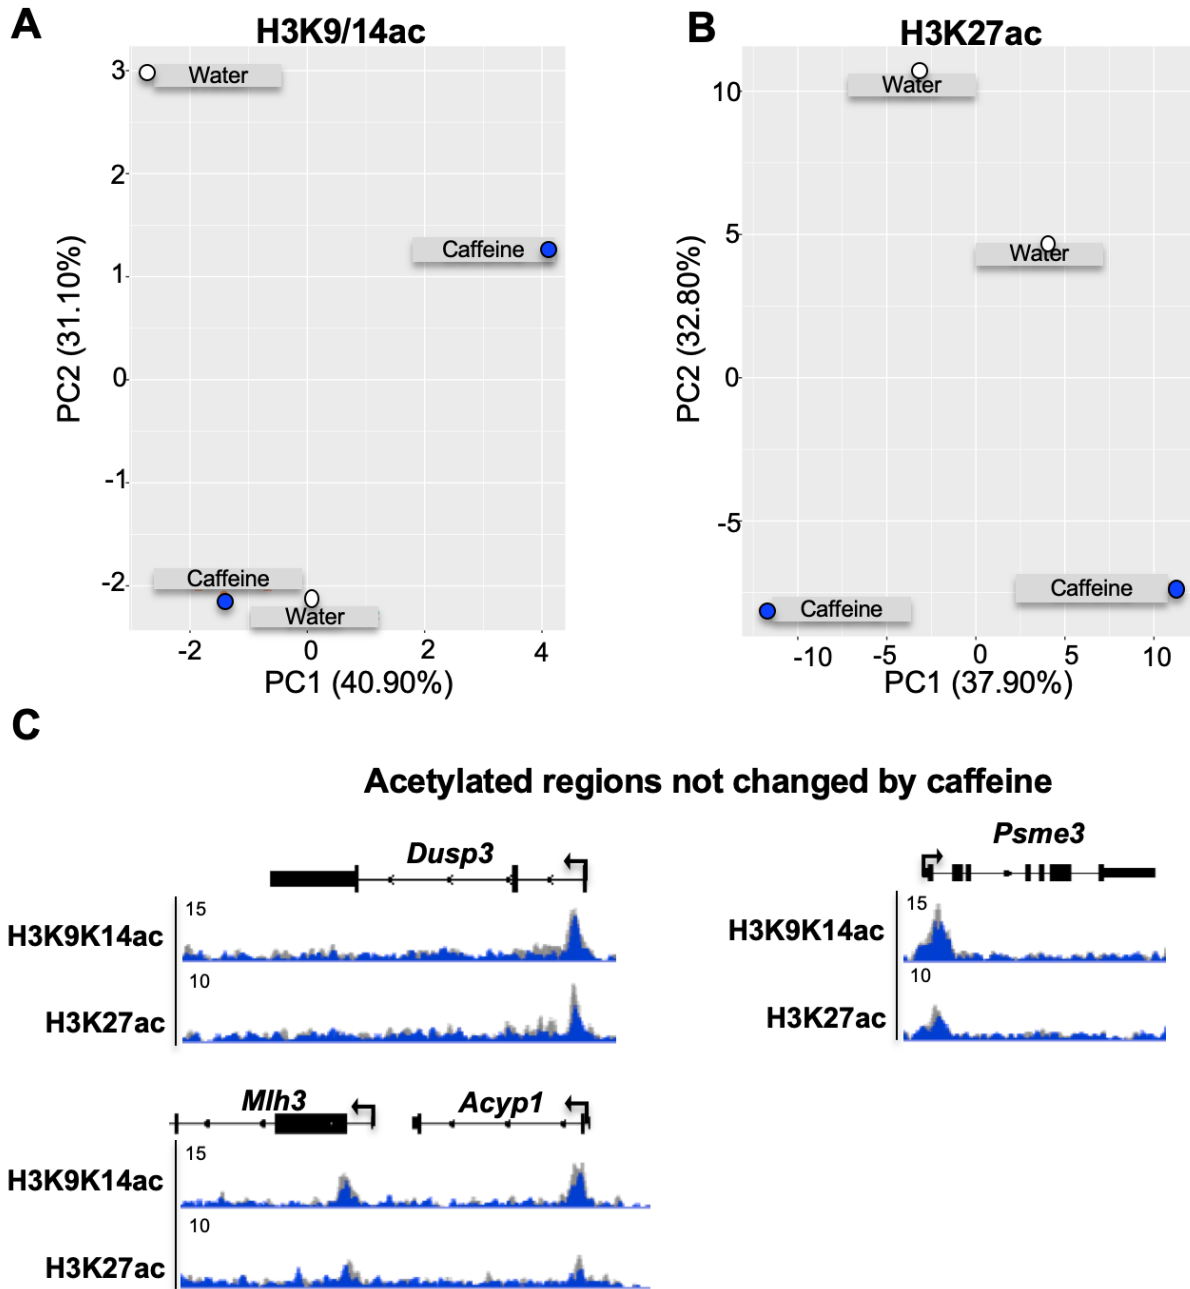

**Supplemental Figure 1. ChIP-seq of bulk hippocampus of water and caffeine-treated mice.** Principal Component Analysis (PCA) of control (water-treated) and caffeine-treated mice from ChIP-seq of H3K9/14ac (A) and H3K27ac (B) data (N=2). H3K27ac mark shows more robust separation between water and caffeine-treated animals. A total of 2 biological replicates were used per histone mark. (C) Genomic representation by The Integrative Genomics Viewer (IGV) of some representative H3K9/14 and H3K27 acetylated regions not altered by chronic caffeine consumption in the mouse hippocampus (*Dusp3*, *Psme3*, *Mlh3*, *Acyp1*).

**A RNA-seq: Caffeine vs Water**

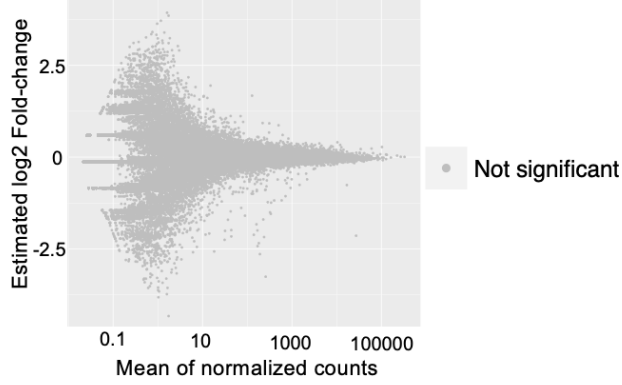

**B H3K27ac depleted**  
(2015 peaks: 1776 genes)

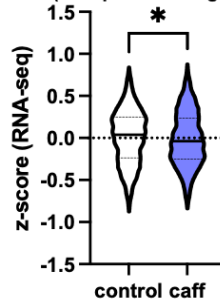

**Random genes selection**  
(1776)

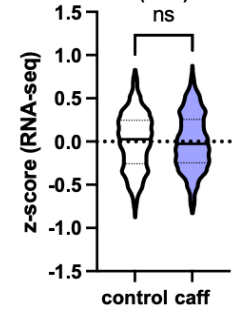

**C**

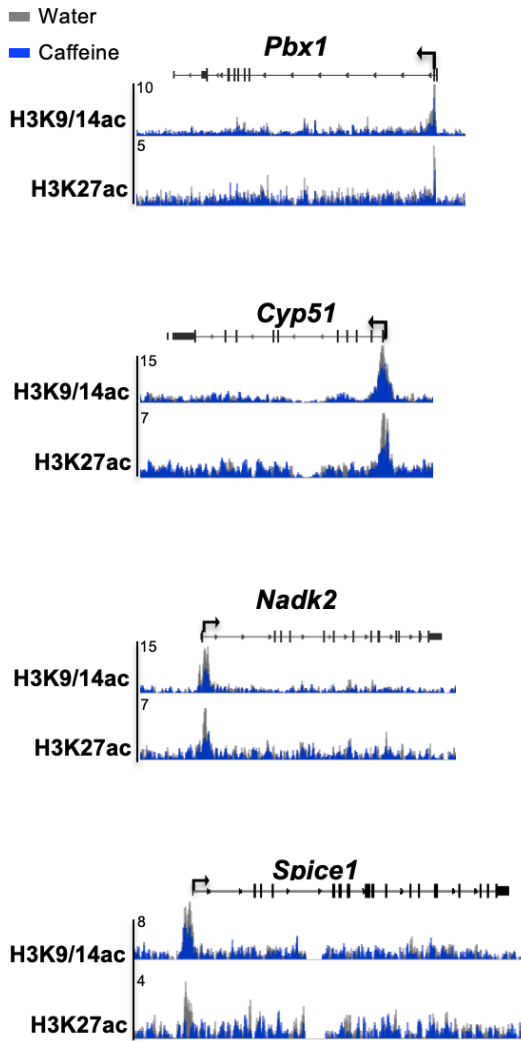

**D**

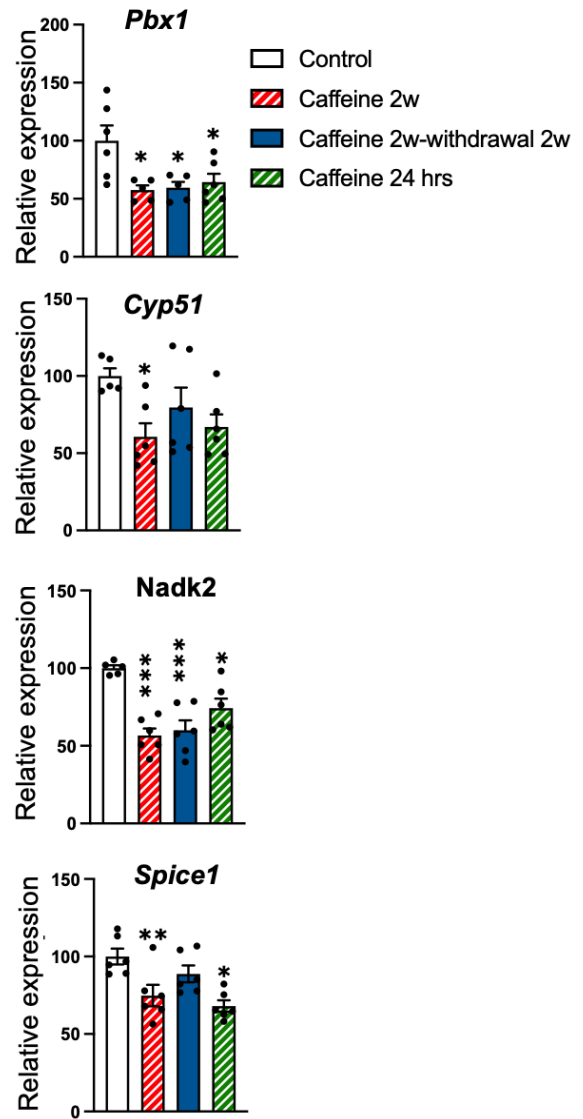

**Supplemental Figure 2. Hippocampal transcriptomics of water and caffeine-treated mice.** (A) MA plot generated from RNA-seq data showing no statistically significant gene expression changes between water and caffeine-treated animals in basal conditions (N=4). (B) Violin plot representation of the integration between RNA-seq and ChIP-seq of H3K27ac depleted genes in caffeine-treated mice showing significant overall decrease in gene expression (z-score) (b) over the same number of randomly chosen genes (test performed in 6 different random datasets). \* $p < 0.05$  using unpaired two-tailed T-test. (C) Genomic region representation of some metabolic and transcription-related genes found depleted in H3K27ac and H3K9/14ac in caffeine-treated mice. (D) RT-qPCR results of these acetylation depleted genes after acute (24h), chronic treatment (2 weeks) as well as after caffeine withdrawal (2 weeks) (N=5-6). Data are shown as mean  $\pm$  SEM. \*  $p < 0.05$ ; \*\*  $p < 0.01$ ; \*\*\* $p < 0.001$  vs control using One-Way ANOVA followed by Tukey's multiple comparison test.

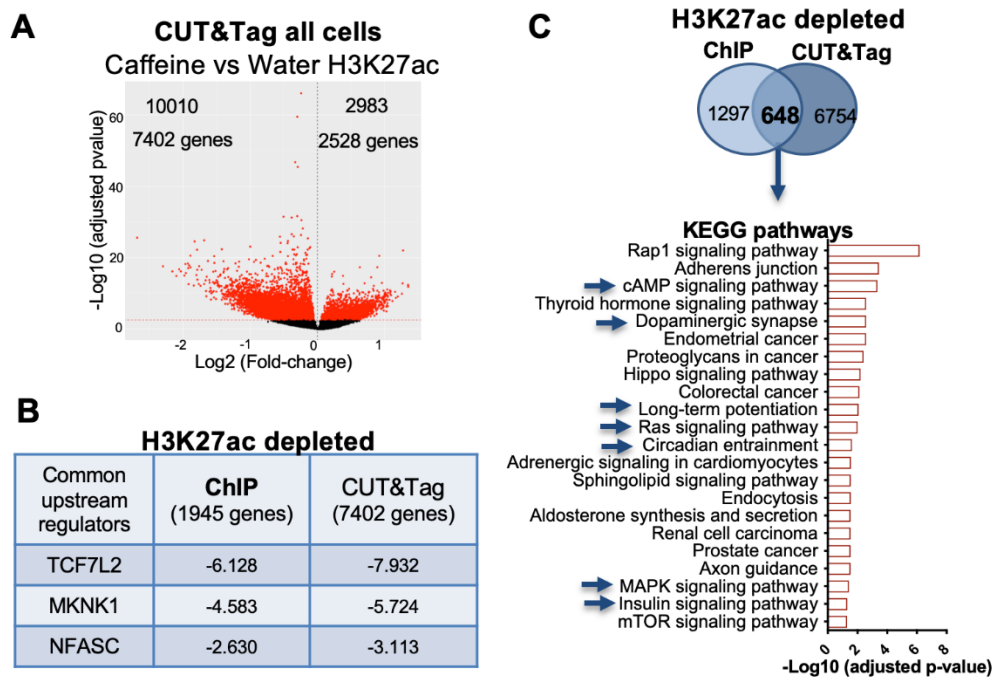

**Supplemental Figure 3. H3K27ac CUT&Tag in all cells.** (A) Volcano plot showing the differential enriched genomic regions of H3K27ac (CUT&Tag) upon caffeine treatment (10010 decreased and 2983 increased peaks) in all cells. Red dots represent the significant different regions (FDR<0.003). (A) Ingenuity Pathway Analysis (IPA) of ChIP-seq and CUT&Tag decreased H3K27ac genes, showing common upstream regulators in both datasets. (C) Overlap of decreased H3K27ac genes between both epigenetic techniques showing that approximately 30% (648) of the decreased H3K27ac genes by ChIP-seq was found using the CUT&Tag technique. KEGG pathways of the common H3K27ac depleted genes between both techniques. Blue arrows pointing towards the pathways found in H3K27ac ChIP-seq represented in Figure 1e. A total of 2 biological replicates were used for both experiments.

**A CUT&Tag: neurons**

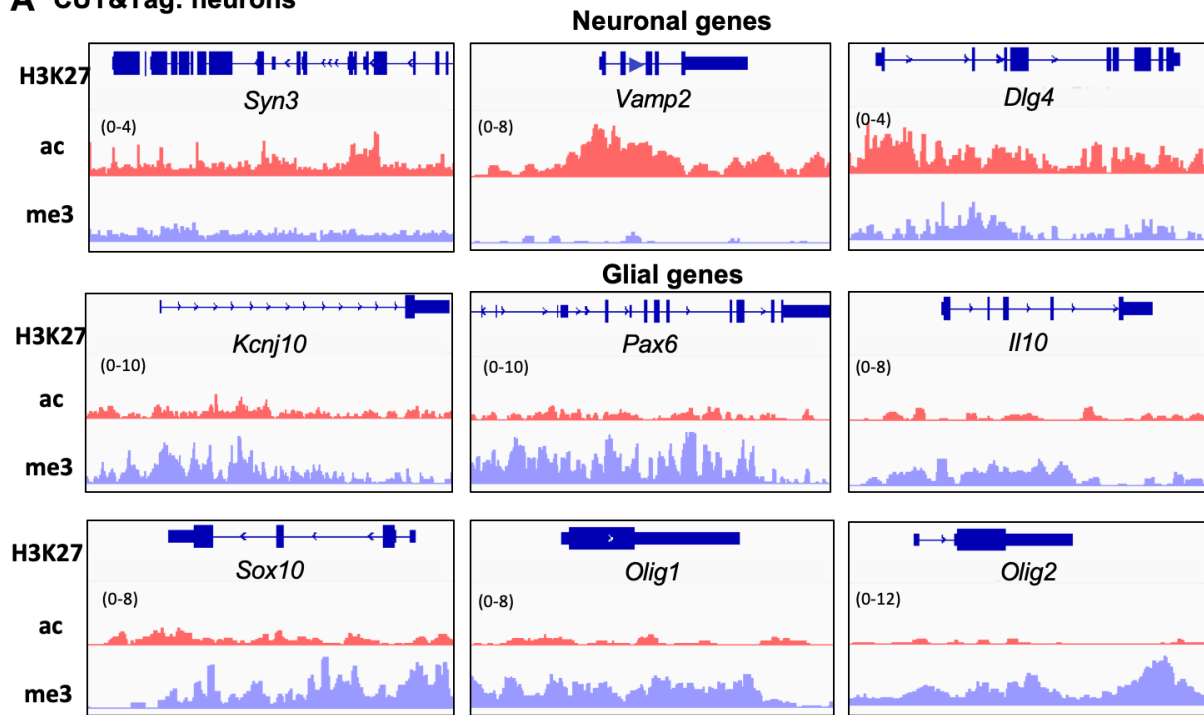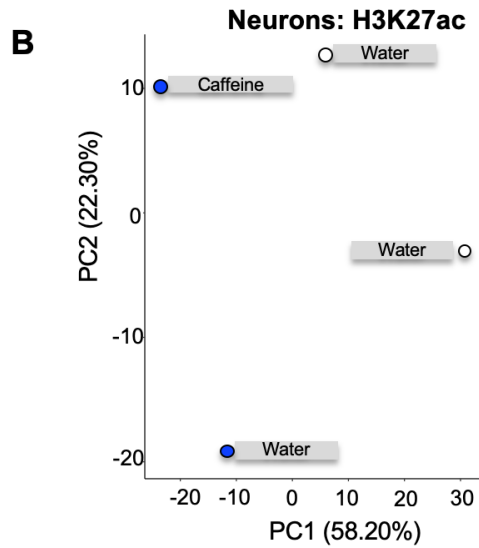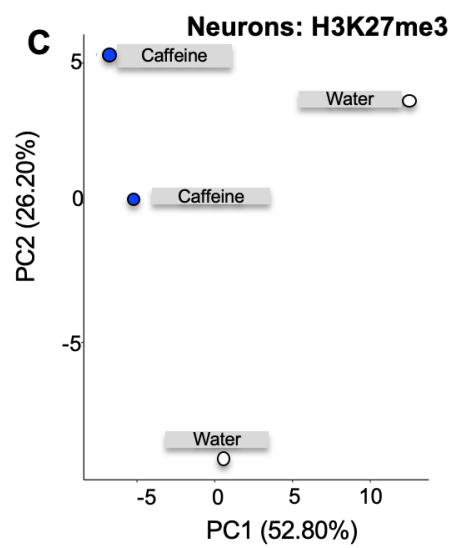

**Supplemental Figure 4. Validation of CUT&Tag in neurons.** (A) Genomic representation (IGV) of the H3K27ac and H3K27me3 in control samples of neuronal genes, showing higher enrichment in acetylation and depleted in methylation. (B) Genomic representation of glial-related genes demonstrating higher H3K27me3 levels compared with the acetylation ones. (C) PCA plot of control (water-treated) and caffeine-treated mice from CUT&Tag of H3K27ac an (d) and H3K27me3 samples. A total of 2 biological replicates were used per histone mark.

**A Depleted regions (H3K27ac)**

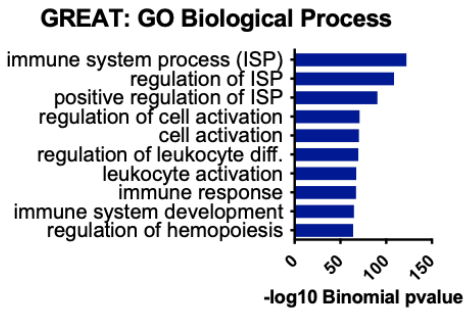

**B Enriched regions (H3K27me3)**

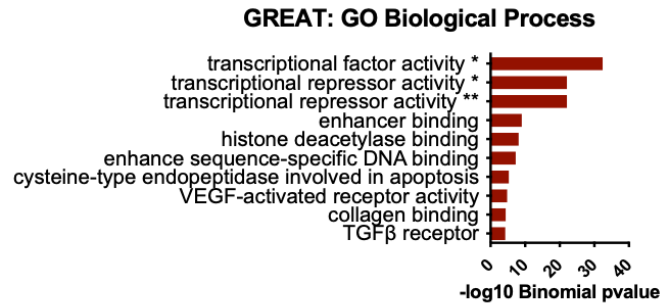

**C Intersection: H3K27ac and H3K27me3 regions**

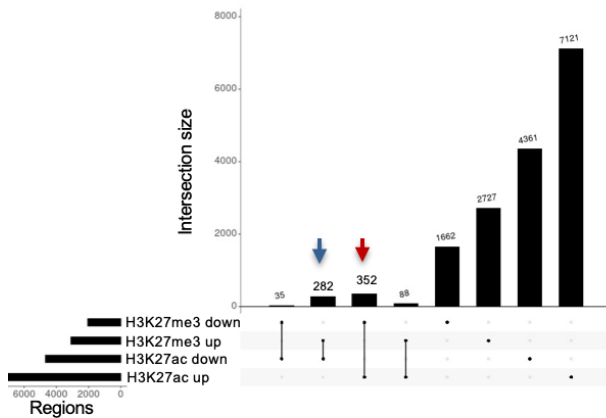

**D Down H3K27ac and Up H3K27me3 (282 regions)**

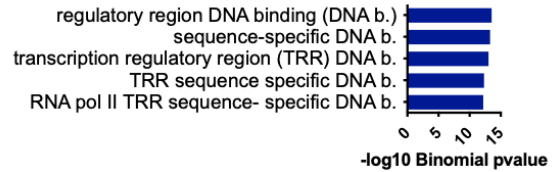

**Up H3K27ac and Down H3K27me3 (352 regions)**

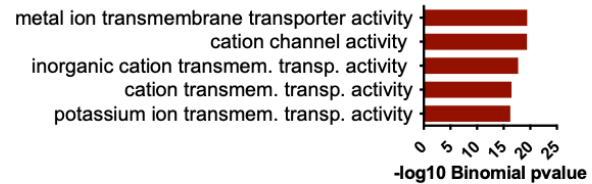

**E**

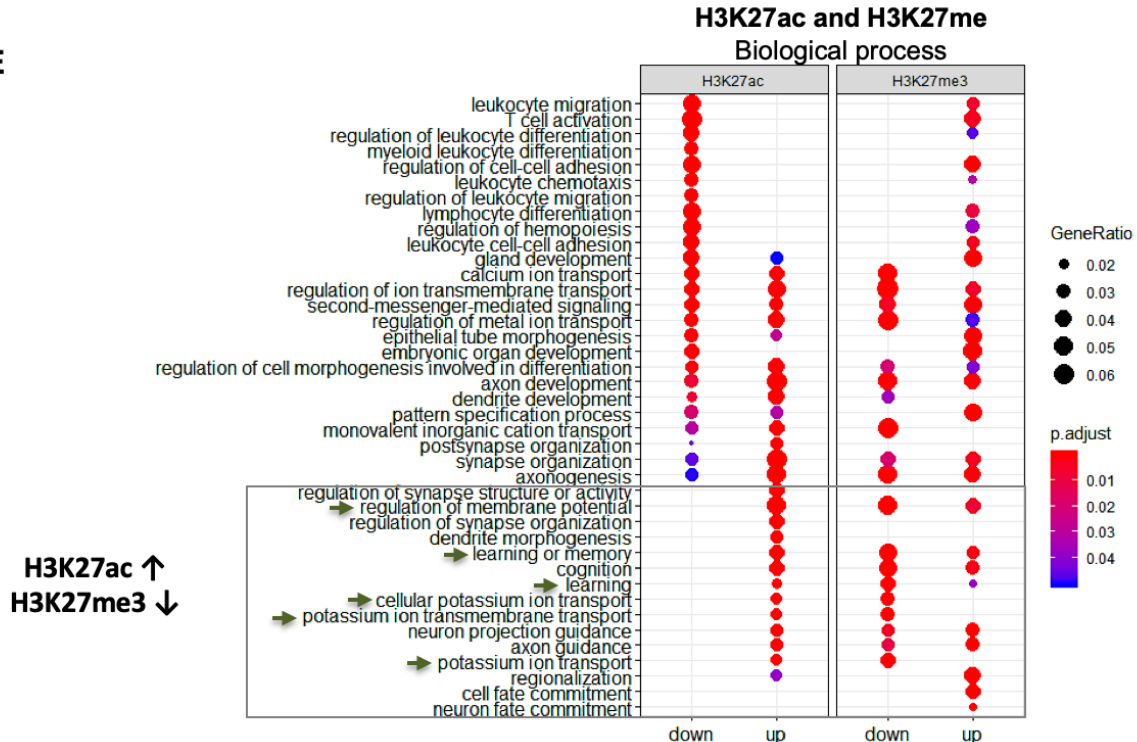

**Supplemental Figure 5. Gene Ontology analysis of H3K27ac and H3K27me3 changes induced by caffeine in mouse hippocampal neurons.** (A) GREAT analysis of H3K27ac depleted regions and (B) H3K27me3 enriched ones showing the most significant associated Biological Processes. (C) Intersection of depleted/enriched regions between H3K27ac and H3K27me3 (Bedsect V3 tool, overlap size of 100bp, (Mishra G et al, 2020. *BedSect: An Integrated Web Server Application to Perform Intersection, Visualization, and Functional Annotation of Genomic Regions From Multiple Datasets. Frontiers in Genetics, 1664-8021*). (D, blue) GREAT analysis of the regions depleted in H3K27ac and increased in H3K27me3 (282 regions) showing that transcription-related terms are among the most significant molecular functions. (d, red) GREAT analysis of the genomic regions increased in H3K27ac and depleted in H3K27me3 demonstrating that ion transport-related molecular functions are the most significant terms. (E) ClusterProfiler analysis (Wu T. et al, 202, *clusterProfiler 4.0: A universal enrichment tool for interpreting omics data. The Innovation 2(3), 100141*) of depleted/enriched H3K27ac and H3K27me3 showing the most significant deregulated biological processes (adjusted p-value<0.05). Warmer colors represent greater statistical significance and circle size determines the gene ratio within the pathway. H3K27ac enrichment and H3K27me3 depleted genes are related to membrane potential as well as learning and memory processes.

\*RNA pol II core promoter proximal region sequence-specific binding

\*\*RNA pol II transcription regulatory region sequence-specific binding



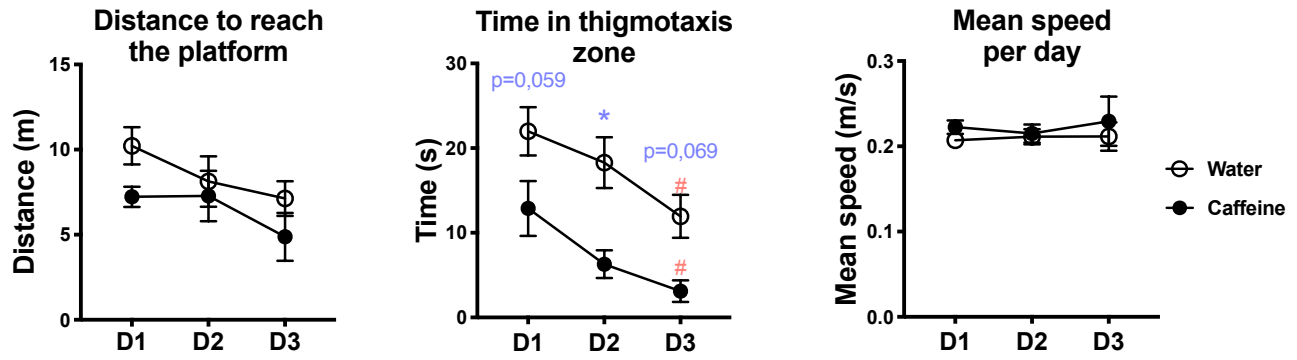

**Supplemental Figure 6. Morris-Water maze experiments in water and caffeine-treated animals.**

Distance to reach the platform (in meters) during the acquisition period (N=4). Thigmotaxic analysis, represented by the time spent in the periphery of the pool during the 3-days of training, Day 1 and 3 show a tendency for decreased thigmotaxic behavior in the Caffeine group ( $p=0.059$  and  $p=0.069$ , respectively). Swim speed (m/second) during the 3 days for both groups. Data are shown as mean  $\pm$  SEM. \*  $p<0.05$  for caffeine vs control using One-Way ANOVA followed by Sidak's multiple comparison test.

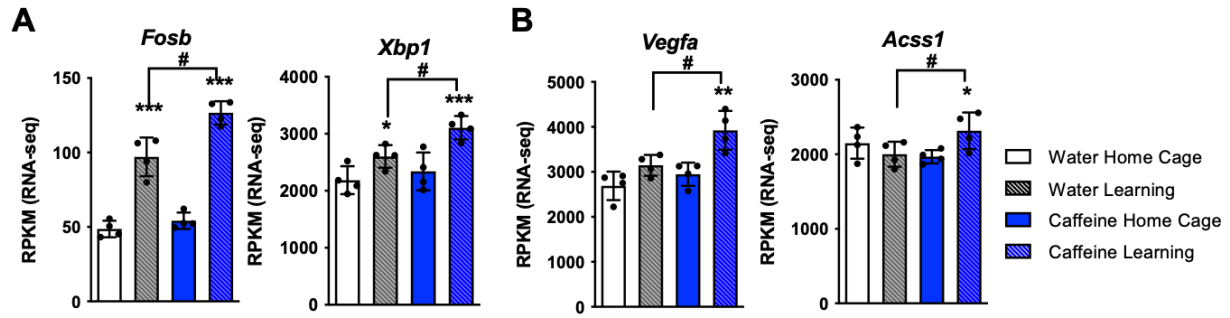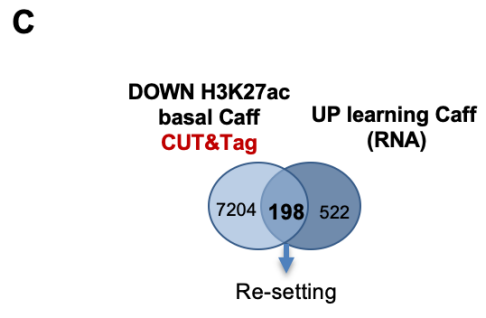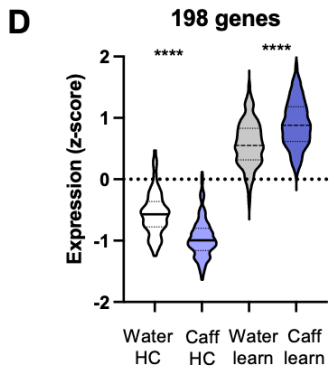

**E**  
 DOWN H3K27ac, all cells/ UP Learning caffeine (RNA)

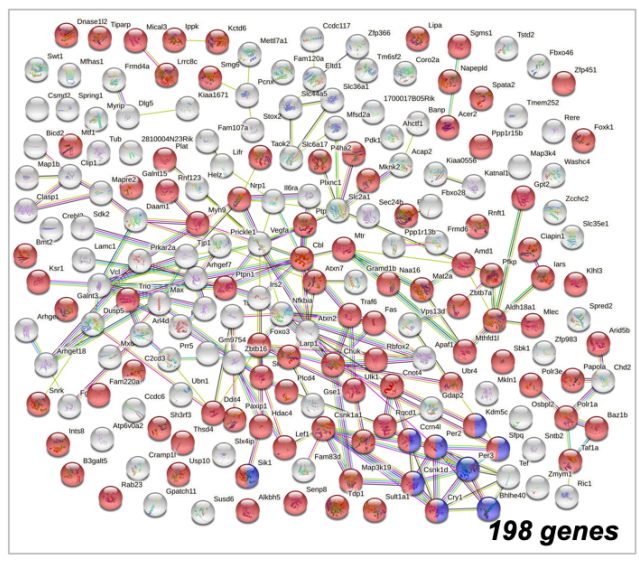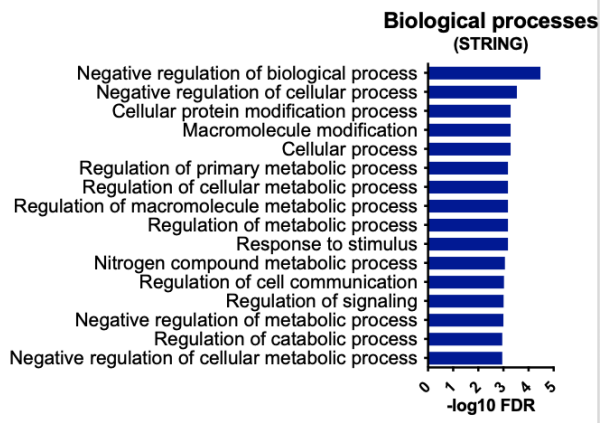

**Supplemental Figure 7. Caffeine-induced transcriptomic alterations upon learning and integration with H3K27ac CUT&Tag dataset** (A) RNA-seq data of genes up-regulated by learning in both control and caffeine-treated animals, but significantly more induced in the Caffeine group. (B) Genes up-regulated by learning specifically in the Caffeine group. P-values were retrieved from DESeq2 analysis: \*  $p < 0.05$ ; \*\*  $p < 0.01$ ; \*\*\*  $p < 0.001$ , between learning and home cage conditions. #  $p < 0.05$  between both learning groups. (C) Venn diagram showing the overlap of 198 genes that were depleted in H3K27ac (all cells hippocampus CUT&Tag) and up-regulated (RNA-seq) by learning in caffeine-treated mice (re-setting effect). (D) Violin plots of the expression values (z-score) of the 198 genes showing decreased expression in home-cage (HC) and increased in learning conditions between water and caffeine-treated mice. \*\*\*\*  $p < 0.0001$  using One-way ANOVA followed Bonferroni's multiple comparison post hoc test. (E) Gene ontology analysis performed with STRING of the 198 genes demonstrating that they are strongly associated with metabolic related biological processes (top 16 by FDR). Data in C-E refers to CUT&Tag all cells and supports the results obtained by ChIP-seq bulk hippocampus (Figure 5 I-K).

**Supplemental Table 1.** Differential enrichment analysis from H3K9/14ac and ChIP-seq between caffeine treated and control mice hippocampus (xls uploaded).

**Supplemental Table 2.** Differential enrichment analysis from H3K27ac ChIP-seq between caffeine treated and control mice hippocampus (xls uploaded).

**Supplemental Table 3.** Canonical pathways (IPA) of epigenomics data (H3K27ac and H3K9/14ac) filtered by Central Nervous System terms (xls uploaded).

**Supplemental Table 4.** Upstream Regulators (IPA) of epigenomics data (H3K27ac and H3K9/14ac) filtered by Central Nervous System term (xls uploaded).

Most probable assignment based on *m/z* measurements of metabolites and lipids detected in negative and positive ionization modes and differentially expressed in hippocampus from Water and Caffeine animals

| Experimental mass ( <i>m/z</i> ) | Precision Δ <i>M</i> expe / theo (ppm) | Intensity Mean ± SEM (a.u.) |                         | <i>p</i> -value | Identified species                                               |
|----------------------------------|----------------------------------------|-----------------------------|-------------------------|-----------------|------------------------------------------------------------------|
|                                  |                                        | Water                       | Caffeine                |                 |                                                                  |
| <b>Negative ionization mode</b>  |                                        |                             |                         |                 |                                                                  |
| 152.996                          | 1                                      | 10659.3 ± 407.2             | <u>14039.5 ± 413.0</u>  | 0.000487        | Propanoyl phosphate [M-H] <sup>-</sup>                           |
|                                  | 1                                      |                             |                         |                 | Glycerol phosphate [M-H <sub>2</sub> O-H] <sup>-</sup>           |
| 524.299                          | 0                                      | 17639.4 ± 464.9             | <u>22034.3 ± 415.7</u>  | 0.000200        | PS {18:0} [M-H] <sup>-</sup>                                     |
| 337.092                          | 3                                      | <u>11349.5 ± 435.7</u>      | 9924.4 ± 190.9          | 0.038041        | <i>p</i> -coumaroylquinic acid [M-H] <sup>-</sup>                |
| 443.279                          | 2                                      | <u>45040.8 ± 3849.4</u>     | 21942.2 ± 1354.6        | 0.005798        | 1,25-dihydroxyvitamin D3-26,23-lactone [M-H] <sup>-</sup>        |
| 447.295                          | 2                                      | <u>14785.1 ± 208.8</u>      | 13382.9 ± 135.8         | 0.001815        | Vitamin D3 6,19-sulfur dioxide adduct [M-H] <sup>-</sup>         |
|                                  | 3                                      |                             |                         |                 | Cholesterol sulfate [M-H <sub>2</sub> O-H] <sup>-</sup>          |
| 827.469                          | 4                                      | <u>24516.0 ± 4405.8</u>     | 5709.6 ± 1362.7         | 0.018866        | PI {34:5} [M-H] <sup>-</sup>                                     |
| 828.561                          | 7                                      | <u>20347.7 ± 3804.5</u>     | 3723.6 ± 1128.7         | 0.017847        | PS {P-42:6} [M-H <sub>2</sub> O-H] <sup>-</sup>                  |
| 831.539                          | 0                                      | <u>20221.6 ± 3739.0</u>     | 4659.0 ± 1296.1         | 0.019488        | PI {P-35:2} [M-H] <sup>-</sup>                                   |
| 842.540                          | 7                                      | <u>10170.0 ± 1108.0</u>     | 3560.6 ± 541.4          | 0.004298        | PS {42:7} [M-H <sub>2</sub> O-H] <sup>-</sup>                    |
| 847.577                          | 7                                      | <u>16642.4 ± 1196.0</u>     | 7821.7 ± 92.2           | 0.001121        | PI {O-36:2} [M-H] <sup>-</sup>                                   |
|                                  | 7                                      |                             |                         |                 | PI {36:0} [M-H <sub>2</sub> O-H] <sup>-</sup>                    |
| 855.497                          | 7                                      | <u>22393.2 ± 827.1</u>      | 11432.1 ± 937.4         | 0.000025        | PI {36:5} [M-H] <sup>-</sup>                                     |
| 883.532                          | 2                                      | <u>229512.0 ± 11077.1</u>   | 178182.5 ± 6766.9       | 0.009912        | PI {38:5} [M-H] <sup>-</sup>                                     |
| <b>Positive ionization mode</b>  |                                        |                             |                         |                 |                                                                  |
| 284.074                          | 0                                      | 26332.4 ± 1348.5            | <u>30310.3 ± 1121.9</u> | 0.047579        | Dihydromaleimide beta-D-glucoside [M+Na] <sup>+</sup>            |
| 898.626                          | 4                                      | 17646.9 ± 1337.2            | <u>32711.7 ± 4679.1</u> | 0.022135        | PC {43:6} [M+Na] <sup>+</sup>                                    |
| 170.033                          | 2                                      | <u>83402.3 ± 3374.0</u>     | <u>72722.6 ± 2082.5</u> | 0.026387        | Creatine [M+K] <sup>+</sup>                                      |
| 270.119                          | 3                                      | <u>105336.6 ± 3957.0</u>    | 90827.1 ± 1932.4        | 0.012552        | Histidylasparagine [M+H] <sup>+</sup>                            |
|                                  | 9                                      |                             |                         |                 | γ-aminobutyryl-lysine [M+K] <sup>+</sup>                         |
| 391.287                          | 7                                      | <u>123861.0 ± 1309.7</u>    | 113458.7 ± 1963.0       | 0.001838        | Bile acid derivate [M+H] <sup>+</sup>                            |
| 410.264                          | 7                                      | <u>50019.2 ± 1693.1</u>     | 41920.0 ± 2059.1        | 0.013017        | Tetradecanoylcarnitine [M+K] <sup>+</sup>                        |
|                                  | 7                                      |                             |                         |                 | Myristoylcarnitine [M+K] <sup>+</sup>                            |
| 527.075                          | 2                                      | <u>32487.8 ± 1118.4</u>     | 25189.1 ± 1384.8        | 0.002347        | 3-carboxy-1-hydroxypropylthiamine diphosphate [M+H] <sup>+</sup> |
| 772.454                          | 1                                      | <u>325522.0 ± 3499.6</u>    | 302339.8 ± 7855.2       | 0.031209        | PS {32:1} [M+K] <sup>+</sup>                                     |
| 774.508                          | 1                                      | <u>1332720.0 ± 23552.2</u>  | 1231530.0 ± 35929.2     | 0.044080        | PC {36:8} [M+H] <sup>+</sup>                                     |
|                                  | 5                                      |                             |                         |                 | PC {34:5} [M+Na] <sup>+</sup>                                    |
| 844.517                          | 1                                      | <u>1476413.3 ± 33369.5</u>  | 1363670.0 ± 33724.0     | 0.038853        | Lactosylceramide (d18:1/12:0) [M+K] <sup>+</sup>                 |
|                                  | 9                                      |                             |                         |                 | PC {38:6} [M+K] <sup>+</sup>                                     |
| 848.554                          | 3                                      | <u>3226376.7 ± 89492.7</u>  | 2947261.7 ± 70569.4     | 0.035533        | PC {38:4} [M+K] <sup>+</sup>                                     |
|                                  | 9                                      |                             |                         |                 | PI-Cer (d36:0) [M+Na] <sup>+</sup>                               |

Cer Ceramide; PC Phosphocholine; PI Phosphoinositol; PS Phosphoserine

**Supplemental Table 5.** Metabolomics data (metabolites and lipids) of control and caffeine-treated mice hippocampus.

**Supplemental Table 6.** Proteomic alterations of control and caffeine-treated mice hippocampus (xls uploaded).

**Supplemental Table 7.** Upstream regulators of depleted H3K27ac regions from ChIP-seq and CUT&Tag experiments in bulk hippocampus (xls uploaded).

**Supplemental Table 8.** H3K27ac and H3K27me3 differential enrichment analysis of caffeine-treated mice in hippocampal neurons (CUT&Tag) (xls uploaded).

**Supplemental Table 9.** Differential expression analysis (RNA-seq) performed in the hippocampus of caffeine treated and control mice, in basal and upon learning conditions (xls uploaded).
